# Supplementary material for: Profiling of Chlorogenic Acids from Bidens pilosa and Differentiation of Closely Related Positional Isomers with the Aid of UHPLC-QTOF-MS/MS-Based In-Source Collision-Induced Dissociation
Source: PubMed Central journal article supplement (PMC7281500; doi:10.3390/metabo10050178), 2020-04-29
Supplement: metabolites-10-00178-s001.pdf [file metabolites-10-00178-s001.pdf]

## Profiling of chlorogenic acids from *Bidens pilosa* and differentiation of closely related positional isomers with the aid of UHPLC-qTOF-MS/MS-based in-source collision-induced dissociation

Anza-Tshilidzi Ramabulana<sup>1</sup>, Paul Steenkamp<sup>1</sup>, Ntakadzeni Madala<sup>1,2,\*</sup> and Ian Dubery<sup>1,\*</sup>

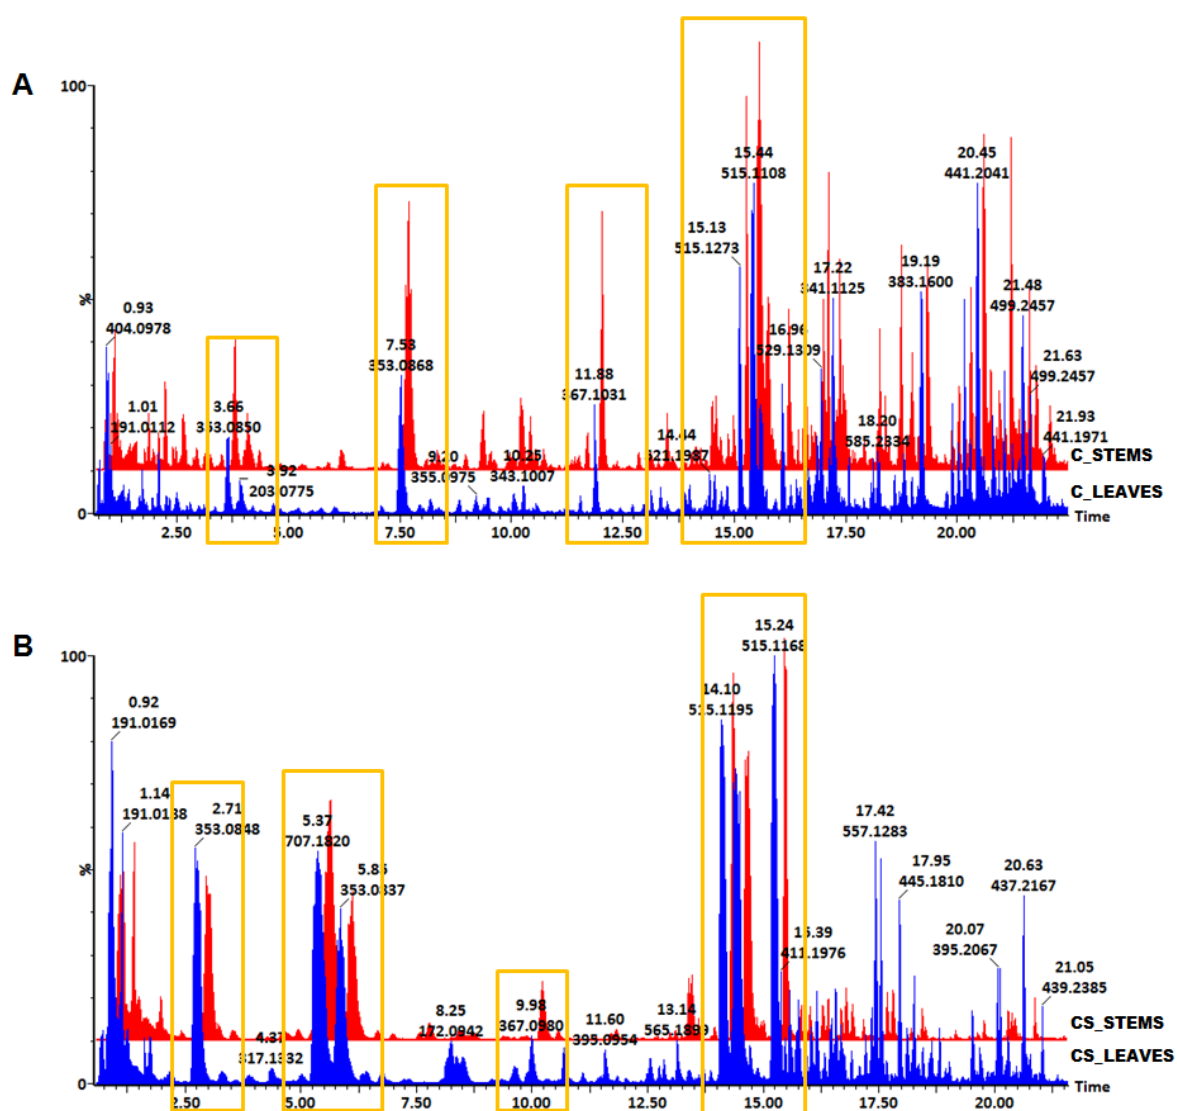

**Figure S1:** (A) Representative UHPLC-QTOF-MS base peak intensity (BPI) chromatograms showing the separation of secondary metabolite in methanol extracts of callus cultures of *B. pilosa* initiated from leaves (blue) and stems (red) explant materials. (B) Representative BPI chromatograms indicating metabolites in methanol extracts of cell suspension cultures of *B. pilosa* initiated from friable callus obtained from leaves and stems as explant materials. Hydroxycinnamic acids derivatives that are present across the cell cultures are indicated with yellow rectangles.

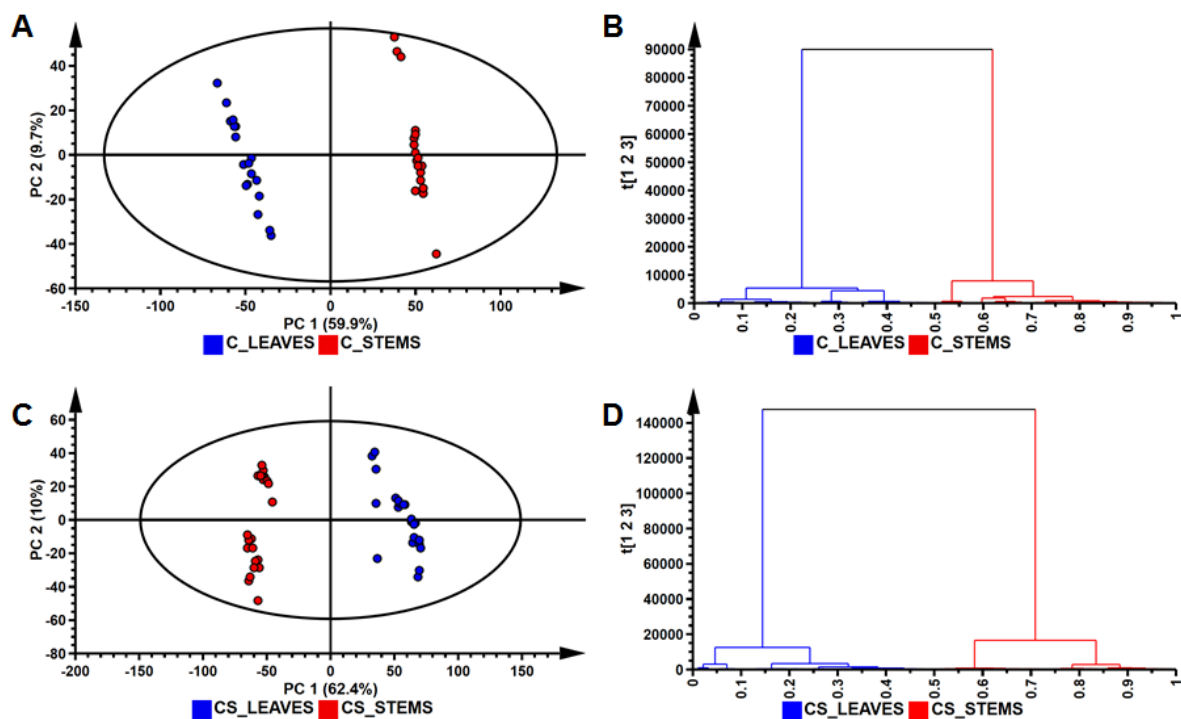

**Figure S2:** (A): Principal component analysis (PCA) score scatterplots indicating tissue-specific differences within *callus* cultures of *B. pilosa* tissue initiated from leaves (blue) and stems (red) explant material. The model obtained was a three-component model and explains 69.87% of the variation. The quality parameters of the model were explained variation/ goodness-of-fit  $R^2=0.631$  and the predictive variance  $Q^2=0.558$ . The ellipse in the PCA score scatterplot indicates the Hotelling's  $T^2$  with a 95% confidence interval. (B): A hierarchical cluster analysis (HCA) dendrogram showing that the extracts from stem and leaves *callus* cluster into different groups. (C): PCA scores plot of *cell suspensions* (initiated from callus culture of *B. pilosa* leaves and stems) data set indicating different clustering patterns. The model obtained was a three-component model and explains 72.4% of the variation.  $R^2=0.785$  and  $Q^2=0.703$  reported on the goodness-of-fit and the predictive variance of the model. The ellipse in the PCA score scatterplot indicates the Hotelling's  $T^2$  with a 95% confidence interval. (D): HCA indicates differences between *cell suspensions* derived from leaves (CS\_Leaves) and stems (CS\_Stems), forming the two major nodes.

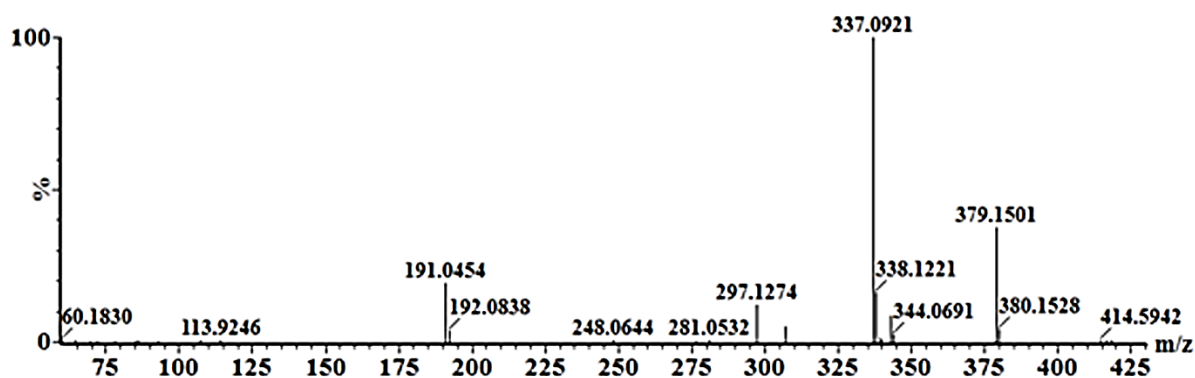

**Figure S3:** A typical mass spectrum of the fragmentation patterns of 5-coumaroylquinic acid.

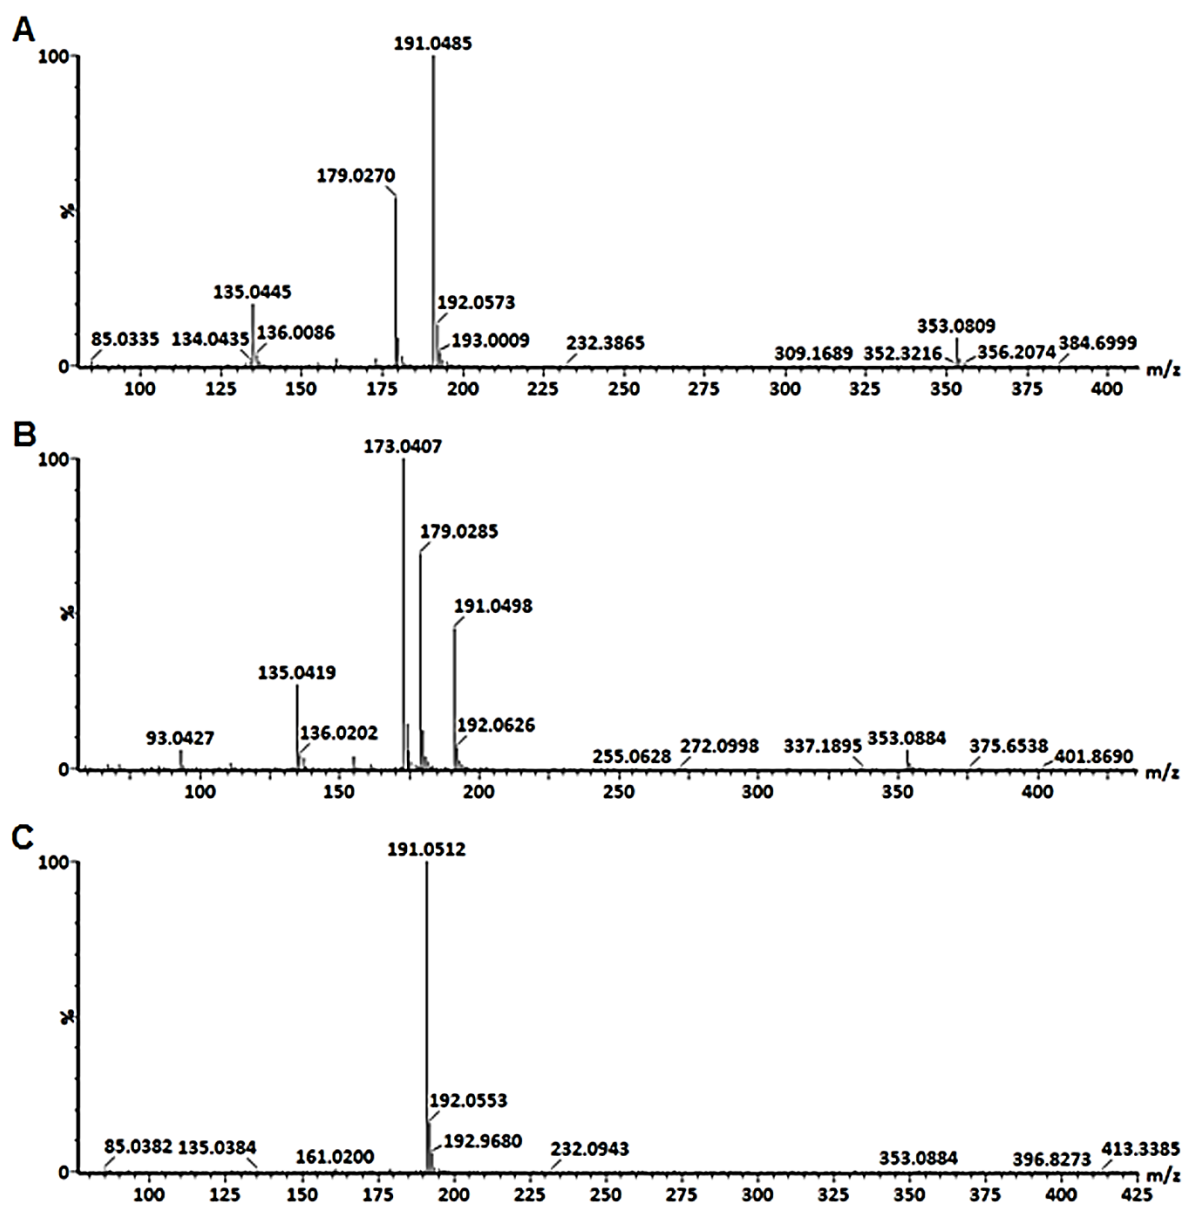

**Figure S4:** Typical mass spectra of the fragmentation patterns of 3-caffeoylquinic acid (A), 4-caffeoylquinic acid (B) and 5-caffeoylquinic acid (C).

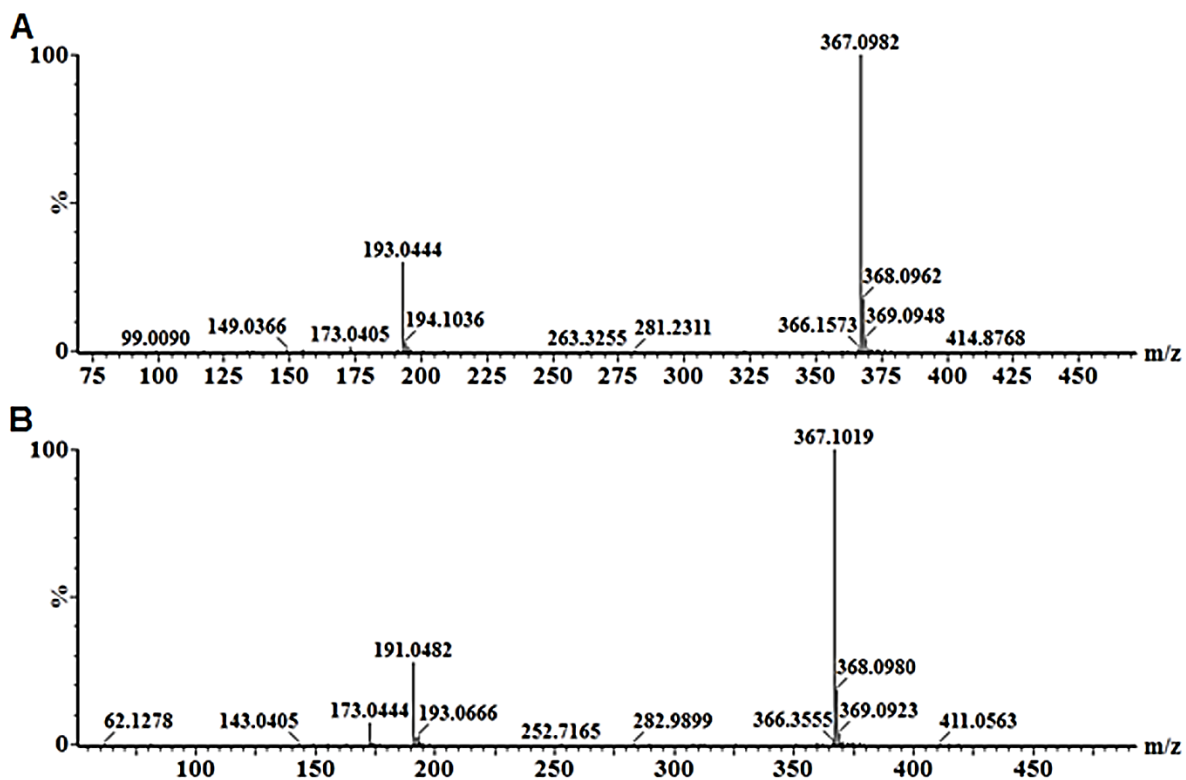

**Figure S5:** Typical mass spectra of the fragmentation patterns of 3-feruloylquinic acid (A) and 4-feruloylquinic acid (B).

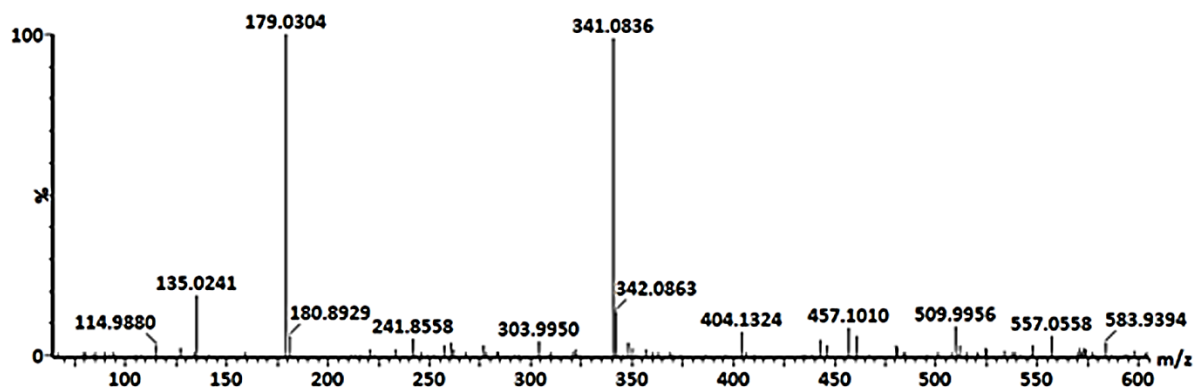

**Figure S6:** A typical mass spectrum of the fragmentation patterns of caffeoylglycoside.

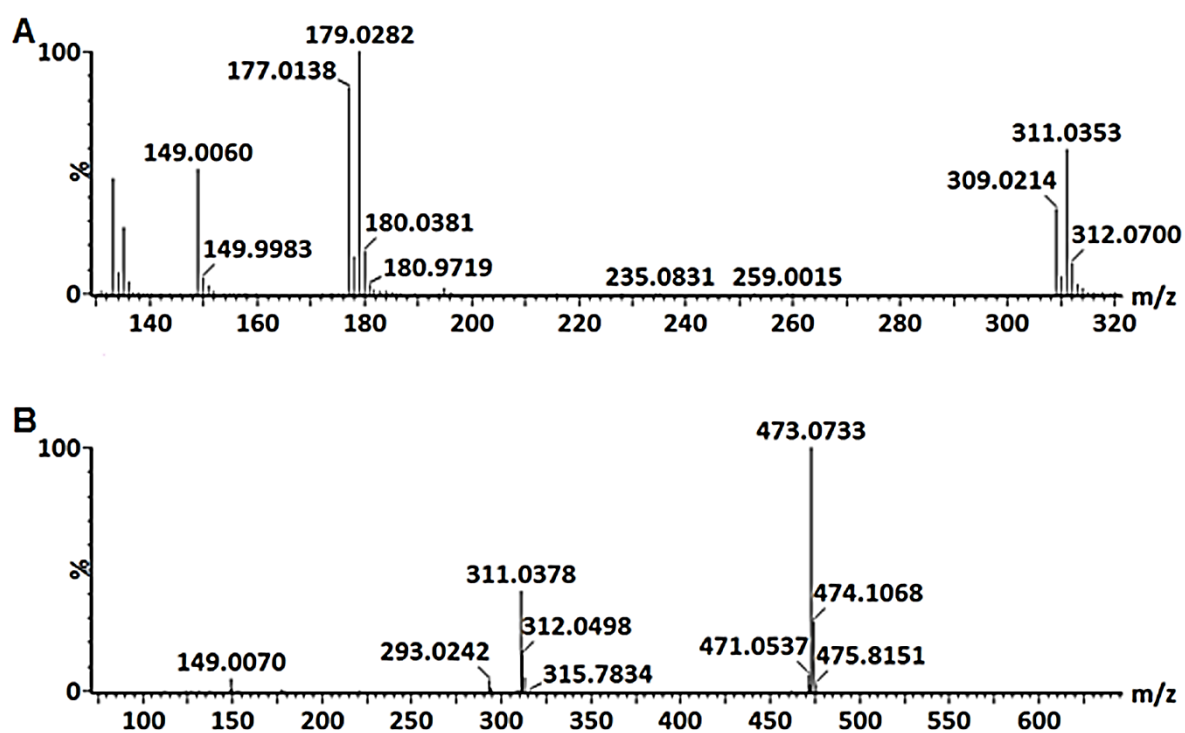

**Figure S7:** Typical mass spectra of the fragmentation patterns of caftaric acid (A) and chicoric acid (B).

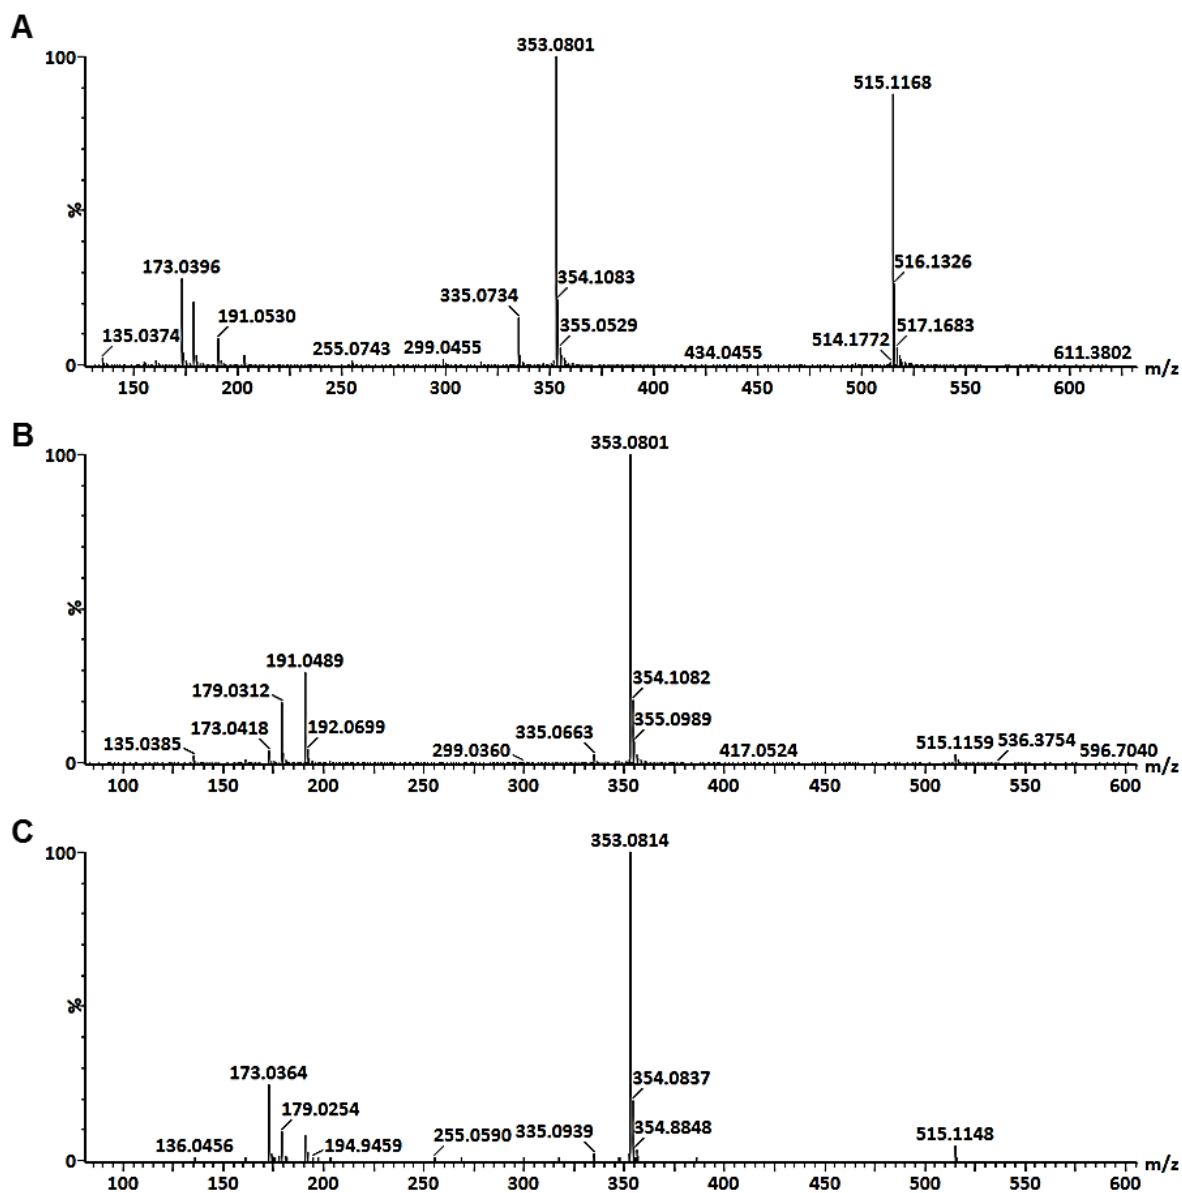

**Figure S8:** Typical mass spectra of the fragmentation patterns of 3,4-*di*-caffeoylquinic acid (A), 3,5-*di*-caffeoylquinic acid (B) and 4,5-*di*-caffeoylquinic acid (C).

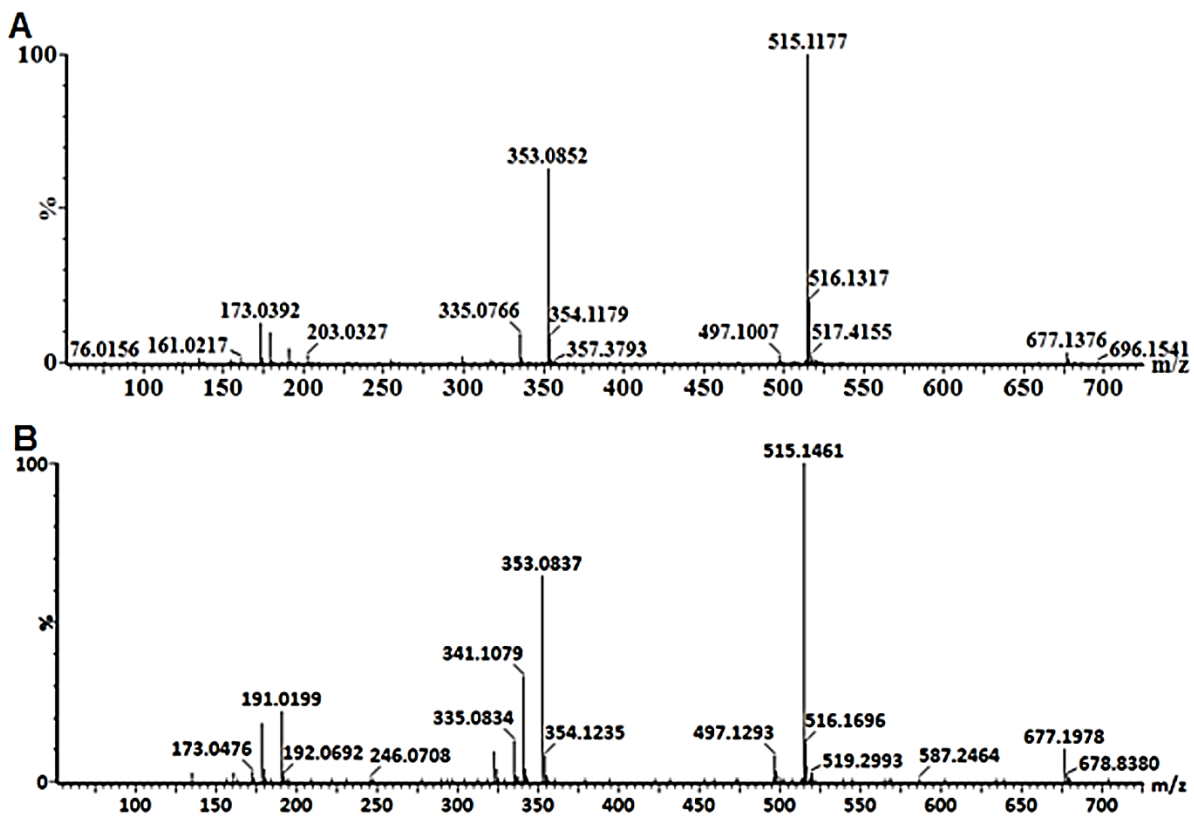

**Figure S9:** Typical mass spectra of the fragmentation patterns of *tri*-caffeoylquinic acid (A) and *di*-caffeoylquinic acid glycoside (B).
